# Supplementary material for: High Correlation of Static First-Minute-Frame (FMF) PET Imaging after 18F-Labeled Amyloid Tracer Injection with [18F]FDG PET Imaging
Source: MDPI journal article supplement (doi:10.3390/s21155182), 2021-07-30
Supplement: s1 [file s1]

# Correlation of static PET data of the first-minute-frame (FMF) after <sup>18</sup>F-labelled amyloid tracer injection to [<sup>18</sup>F]FDG PET images - Supplementary Materials

Alexander P. Seiffert \*, Adolfo Gómez-Grande \*, Alberto Villarejo-Galende, Marta González-Sánchez, Héctor Bueno, Enrique J. Gómez and Patricia Sánchez-González

\* Co-first author, these authors contributed equally to this work.

## S1. Supplementary material to section 2. Materials and methods

### S2.1 Supplementary material to section 2.3. Image analysis

**Table S1.** AAL2 brain regions that compose the grouped VOIs.

| Grouped VOI                | AAL brain region                                                  |
|----------------------------|-------------------------------------------------------------------|
| Frontal                    | Precentral gyrus                                                  |
|                            | Superior frontal gyrus, dorsolateral                              |
|                            | Superior frontal gyrus, orbital part                              |
|                            | Middle frontal gyrus                                              |
|                            | Middle frontal gyrus, orbital part                                |
|                            | Inferior frontal gyrus, opercular part                            |
|                            | Inferior frontal gyrus, triangular part                           |
|                            | Inferior frontal gyrus, orbital part                              |
|                            | Superior frontal gyrus, medial orbital                            |
|                            | Superior frontal gyrus, medial                                    |
| Parietal                   | Gyrus rectus                                                      |
|                            | Postcentral gyrus                                                 |
|                            | Superior parietal gyrus                                           |
|                            | Inferior parietal gyrus, excluding supramarginal and angular gyri |
|                            | Supramarginal gyrus                                               |
|                            | Angular gyrus                                                     |
| Occipital                  | Calcarine fissure and surrounding cortex                          |
|                            | Cuneus                                                            |
|                            | Lingual gyrus                                                     |
|                            | Superior occipital gyrus                                          |
|                            | Middle occipital gyrus                                            |
|                            | Inferior occipital gyrus                                          |
| Temporal                   | Hippocampus                                                       |
|                            | Parahippocampal gyrus                                             |
|                            | Amygdala                                                          |
|                            | Fusiform gyrus                                                    |
|                            | Heschl's gyrus                                                    |
|                            | Superior temporal gyrus                                           |
|                            | Middle temporal gyrus                                             |
|                            | Temporal pole: middle temporal gyrus                              |
|                            | Inferior temporal gyrus                                           |
|                            |                                                                   |
| Anterior cingulate cortex  | Anterior cingulate cortex                                         |
| Posterior cingulate cortex | Posterior cingulate cortex                                        |
| Precuneus                  | Precuneus                                                         |
| Striatum                   | Caudate nucleus                                                   |
|                            | Lenticular nucleus, Putamen                                       |

## S2. Supplementary material to section 3. Results

### S2.1 Supplementary material to section 3.2. SUVR analysis

**Table S2.** Regional SUVRs of [ $^{18}\text{F}$ ]FDG PET and FMFs of A $\beta$ + patients.

| Brain region |   | SUVR (mean $\pm$ SD)   |                 |                                  |                 |                                  |                 |                                  |                 |
|--------------|---|------------------------|-----------------|----------------------------------|-----------------|----------------------------------|-----------------|----------------------------------|-----------------|
|              |   | Study cohort           |                 | [ $^{18}\text{F}$ ]FBP subcohort |                 | [ $^{18}\text{F}$ ]FMM subcohort |                 | [ $^{18}\text{F}$ ]FBB subcohort |                 |
|              |   | [ $^{18}\text{F}$ ]FDG | FMF             | [ $^{18}\text{F}$ ]FDG           | FMF             | [ $^{18}\text{F}$ ]FDG           | FMF             | [ $^{18}\text{F}$ ]FDG           | FMF             |
| Frontal      | L | 0.98 $\pm$ 0.15        | 0.86 $\pm$ 0.10 | 0.95 $\pm$ 0.12                  | 0.84 $\pm$ 0.09 | 1.01 $\pm$ 0.20                  | 0.90 $\pm$ 0.10 | 0.94 $\pm$ 0.13                  | 0.82 $\pm$ 0.09 |
|              | R | 0.99 $\pm$ 0.11        | 0.88 $\pm$ 0.07 | 0.98 $\pm$ 0.11                  | 0.87 $\pm$ 0.07 | 1.01 $\pm$ 0.11                  | 0.90 $\pm$ 0.07 | 0.93 $\pm$ 0.08                  | 0.83 $\pm$ 0.05 |
| Occipital    | L | 1.20 $\pm$ 0.16        | 1.05 $\pm$ 0.11 | 1.17 $\pm$ 0.15                  | 1.01 $\pm$ 0.11 | 1.20 $\pm$ 0.15                  | 1.08 $\pm$ 0.08 | 1.29 $\pm$ 0.23                  | 1.08 $\pm$ 0.15 |
|              | R | 1.19 $\pm$ 0.12        | 1.02 $\pm$ 0.11 | 1.16 $\pm$ 0.14                  | 0.97 $\pm$ 0.13 | 1.21 $\pm$ 0.07                  | 1.06 $\pm$ 0.08 | 1.30 $\pm$ 0.10                  | 1.09 $\pm$ 0.04 |
| Parietal     | L | 0.96 $\pm$ 0.15        | 0.84 $\pm$ 0.08 | 0.92 $\pm$ 0.15                  | 0.81 $\pm$ 0.08 | 1.00 $\pm$ 0.15                  | 0.88 $\pm$ 0.06 | 1.00 $\pm$ 0.19                  | 0.86 $\pm$ 0.15 |
|              | R | 0.89 $\pm$ 0.10        | 0.78 $\pm$ 0.07 | 0.86 $\pm$ 0.11                  | 0.76 $\pm$ 0.08 | 0.91 $\pm$ 0.08                  | 0.80 $\pm$ 0.06 | 0.91 $\pm$ 0.13                  | 0.79 $\pm$ 0.09 |
| Temporal     | L | 0.87 $\pm$ 0.16        | 0.80 $\pm$ 0.11 | 0.81 $\pm$ 0.14                  | 0.74 $\pm$ 0.10 | 0.92 $\pm$ 0.17                  | 0.85 $\pm$ 0.08 | 0.84 $\pm$ 0.15                  | 0.84 $\pm$ 0.15 |
|              | R | 0.88 $\pm$ 0.14        | 0.81 $\pm$ 0.10 | 0.83 $\pm$ 0.15                  | 0.76 $\pm$ 0.12 | 0.92 $\pm$ 0.12                  | 0.86 $\pm$ 0.07 | 0.93 $\pm$ 0.07                  | 0.84 $\pm$ 0.23 |
| ACC          | L | 1.02 $\pm$ 0.15        | 0.94 $\pm$ 0.11 | 1.01 $\pm$ 0.11                  | 0.93 $\pm$ 0.10 | 1.05 $\pm$ 0.18                  | 0.98 $\pm$ 0.12 | 1.00 $\pm$ 0.12                  | 0.89 $\pm$ 0.10 |
|              | R | 1.03 $\pm$ 0.12        | 0.93 $\pm$ 0.08 | 1.02 $\pm$ 0.09                  | 0.93 $\pm$ 0.07 | 1.04 $\pm$ 0.17                  | 0.95 $\pm$ 0.10 | 1.02 $\pm$ 0.09                  | 0.90 $\pm$ 0.09 |
| PCC          | L | 1.04 $\pm$ 0.20        | 0.93 $\pm$ 0.16 | 1.03 $\pm$ 0.17                  | 0.91 $\pm$ 0.15 | 1.04 $\pm$ 0.22                  | 0.96 $\pm$ 0.16 | 1.09 $\pm$ 0.27                  | 0.90 $\pm$ 0.27 |
|              | R | 0.94 $\pm$ 0.18        | 0.81 $\pm$ 0.15 | 0.94 $\pm$ 0.22                  | 0.78 $\pm$ 0.18 | 0.92 $\pm$ 0.15                  | 0.84 $\pm$ 0.11 | 1.00 $\pm$ 0.15                  | 0.82 $\pm$ 0.08 |
| Precuneus    | L | 1.03 $\pm$ 0.18        | 0.94 $\pm$ 0.12 | 0.98 $\pm$ 0.17                  | 0.87 $\pm$ 0.08 | 1.07 $\pm$ 0.18                  | 1.03 $\pm$ 0.11 | 1.09 $\pm$ 0.20                  | 0.93 $\pm$ 0.15 |
|              | R | 1.05 $\pm$ 0.15        | 0.95 $\pm$ 0.13 | 1.01 $\pm$ 0.18                  | 0.89 $\pm$ 0.12 | 1.09 $\pm$ 0.11                  | 1.04 $\pm$ 0.12 | 1.09 $\pm$ 0.14                  | 0.93 $\pm$ 0.11 |
| Striatum     | L | 0.70 $\pm$ 0.18        | 0.57 $\pm$ 0.16 | 0.71 $\pm$ 0.14                  | 0.59 $\pm$ 0.13 | 0.69 $\pm$ 0.22                  | 0.56 $\pm$ 0.18 | 0.69 $\pm$ 0.26                  | 0.82 $\pm$ 0.20 |
|              | R | 0.81 $\pm$ 0.20        | 0.67 $\pm$ 0.18 | 0.82 $\pm$ 0.15                  | 0.68 $\pm$ 0.16 | 0.79 $\pm$ 0.24                  | 0.66 $\pm$ 0.21 | 0.86 $\pm$ 0.27                  | 0.68 $\pm$ 0.20 |

**Table S3.** Regional SUVRs of [ $^{18}\text{F}$ ]FDG PET and FMFs of A $\beta$ - patients.

| Brain region |   | SUVR (mean $\pm$ SD)   |                 |                                  |                 |                                  |                 |                                  |                 |
|--------------|---|------------------------|-----------------|----------------------------------|-----------------|----------------------------------|-----------------|----------------------------------|-----------------|
|              |   | Study cohort           |                 | [ $^{18}\text{F}$ ]FBP subcohort |                 | [ $^{18}\text{F}$ ]FMM subcohort |                 | [ $^{18}\text{F}$ ]FBB subcohort |                 |
|              |   | [ $^{18}\text{F}$ ]FDG | FMF             | [ $^{18}\text{F}$ ]FDG           | FMF             | [ $^{18}\text{F}$ ]FDG           | FMF             | [ $^{18}\text{F}$ ]FDG           | FMF             |
| Frontal      | L | 1.06 $\pm$ 0.16        | 0.89 $\pm$ 0.12 | 1.10 $\pm$ 0.13                  | 0.90 $\pm$ 0.08 | 1.03 $\pm$ 0.18                  | 0.86 $\pm$ 0.15 | 1.07 $\pm$ 0.12                  | 0.95 $\pm$ 0.11 |
|              | R | 1.09 $\pm$ 0.14        | 0.91 $\pm$ 0.09 | 1.12 $\pm$ 0.11                  | 0.92 $\pm$ 0.08 | 1.07 $\pm$ 0.16                  | 0.90 $\pm$ 0.10 | 1.07 $\pm$ 0.12                  | 0.96 $\pm$ 0.12 |
| Occipital    | L | 1.31 $\pm$ 0.12        | 1.12 $\pm$ 0.09 | 1.33 $\pm$ 0.09                  | 1.12 $\pm$ 0.08 | 1.31 $\pm$ 0.15                  | 1.12 $\pm$ 0.10 | 1.24 $\pm$ 0.06                  | 1.15 $\pm$ 0.08 |
|              | R | 1.28 $\pm$ 0.14        | 1.08 $\pm$ 0.10 | 1.28 $\pm$ 0.11                  | 1.06 $\pm$ 0.10 | 1.30 $\pm$ 0.16                  | 1.09 $\pm$ 0.10 | 1.20 $\pm$ 0.05                  | 1.11 $\pm$ 0.09 |
| Parietal     | L | 1.12 $\pm$ 0.10        | 0.94 $\pm$ 0.07 | 1.12 $\pm$ 0.09                  | 0.94 $\pm$ 0.07 | 1.13 $\pm$ 0.11                  | 0.95 $\pm$ 0.08 | 1.04 $\pm$ 0.07                  | 0.96 $\pm$ 0.05 |
|              | R | 1.05 $\pm$ 0.11        | 0.88 $\pm$ 0.08 | 1.05 $\pm$ 0.11                  | 0.87 $\pm$ 0.10 | 1.05 $\pm$ 0.12                  | 0.89 $\pm$ 0.07 | 0.97 $\pm$ 0.54                  | 0.88 $\pm$ 0.05 |
| Temporal     | L | 1.03 $\pm$ 0.12        | 0.89 $\pm$ 0.11 | 1.04 $\pm$ 0.09                  | 0.89 $\pm$ 0.08 | 1.01 $\pm$ 0.14                  | 0.88 $\pm$ 0.14 | 1.06 $\pm$ 0.09                  | 0.96 $\pm$ 0.09 |
|              | R | 1.04 $\pm$ 0.13        | 0.89 $\pm$ 0.11 | 1.02 $\pm$ 0.15                  | 0.86 $\pm$ 0.12 | 1.05 $\pm$ 0.12                  | 0.91 $\pm$ 0.10 | 1.04 $\pm$ 0.11                  | 0.94 $\pm$ 0.12 |
| ACC          | L | 1.04 $\pm$ 0.20        | 0.90 $\pm$ 0.18 | 1.09 $\pm$ 0.13                  | 0.94 $\pm$ 0.11 | 0.98 $\pm$ 0.24                  | 0.85 $\pm$ 0.22 | 1.04 $\pm$ 0.12                  | 0.98 $\pm$ 0.18 |
|              | R | 1.03 $\pm$ 0.17        | 0.87 $\pm$ 0.15 | 1.08 $\pm$ 0.10                  | 0.92 $\pm$ 0.08 | 0.99 $\pm$ 0.20                  | 0.73 $\pm$ 0.18 | 1.01 $\pm$ 0.11                  | 0.90 $\pm$ 0.14 |
| PCC          | L | 1.28 $\pm$ 0.17        | 1.04 $\pm$ 0.10 | 1.32 $\pm$ 0.18                  | 1.03 $\pm$ 0.09 | 1.26 $\pm$ 0.16                  | 1.04 $\pm$ 0.12 | 1.24 $\pm$ 0.24                  | 1.04 $\pm$ 0.12 |
|              | R | 1.13 $\pm$ 0.17        | 0.92 $\pm$ 0.13 | 1.15 $\pm$ 0.16                  | 0.89 $\pm$ 0.12 | 1.13 $\pm$ 0.18                  | 0.94 $\pm$ 0.14 | 1.03 $\pm$ 0.22                  | 0.88 $\pm$ 0.13 |
| Precuneus    | L | 1.24 $\pm$ 0.12        | 1.06 $\pm$ 0.08 | 1.28 $\pm$ 0.11                  | 1.05 $\pm$ 0.07 | 1.23 $\pm$ 0.13                  | 1.07 $\pm$ 0.09 | 1.16 $\pm$ 0.05                  | 1.07 $\pm$ 0.03 |
|              | R | 1.28 $\pm$ 0.14        | 1.08 $\pm$ 0.10 | 1.30 $\pm$ 0.15                  | 1.07 $\pm$ 0.10 | 1.28 $\pm$ 0.14                  | 1.10 $\pm$ 0.10 | 1.16 $\pm$ 0.07                  | 1.08 $\pm$ 0.06 |
| Striatum     | L | 0.80 $\pm$ 0.23        | 0.62 $\pm$ 0.20 | 0.84 $\pm$ 0.20                  | 0.66 $\pm$ 0.14 | 0.76 $\pm$ 0.26                  | 0.59 $\pm$ 0.25 | 0.82 $\pm$ 0.11                  | 0.64 $\pm$ 0.08 |
|              | R | 0.88 $\pm$ 0.20        | 0.70 $\pm$ 0.17 | 0.90 $\pm$ 0.19                  | 0.72 $\pm$ 0.16 | 0.86 $\pm$ 0.22                  | 0.68 $\pm$ 0.19 | 0.87 $\pm$ 0.10                  | 0.76 $\pm$ 0.09 |

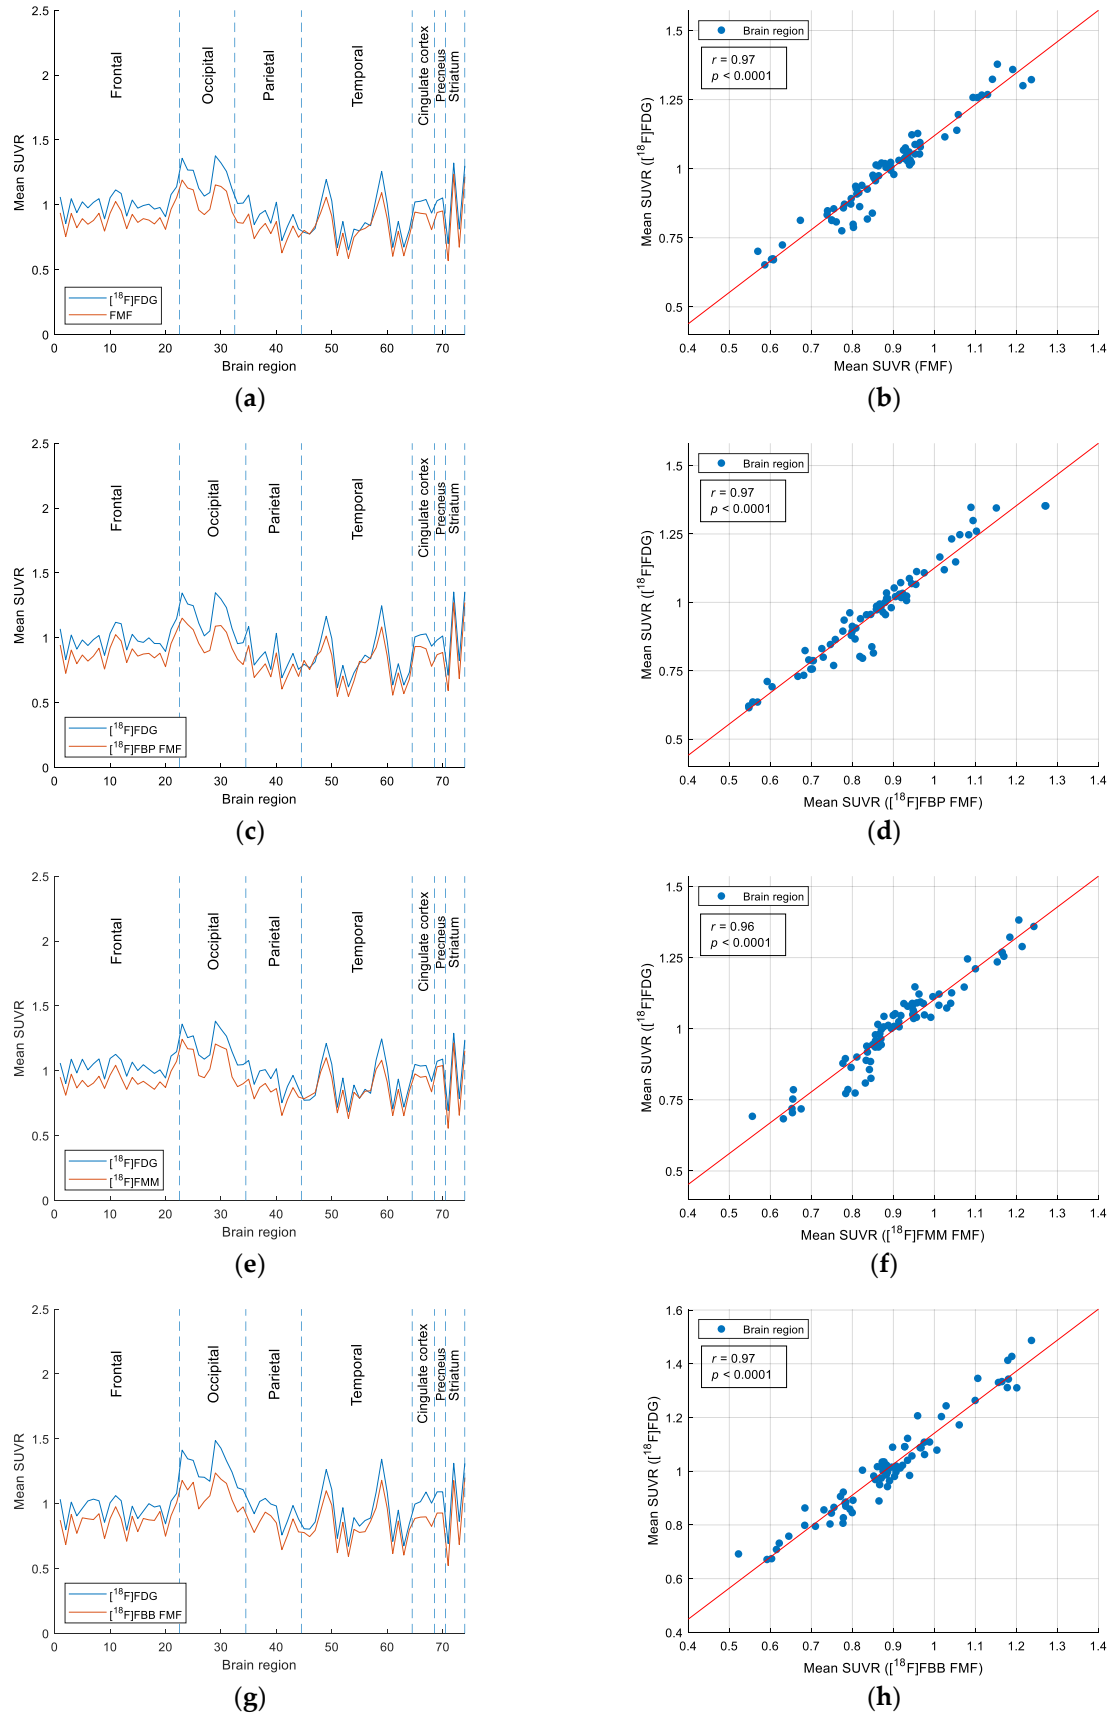

**Figure S1.** Intensity profiles and correlation charts with least squares line of the mean SUVRs of FMFs and  $[^{18}\text{F}]\text{FDG}$  PET of  $\text{A}\beta^+$  patients. (a), (b) Study cohort; (c), (d)  $[^{18}\text{F}]\text{FBP}$  FMFs; (e), (f)  $[^{18}\text{F}]\text{FMM}$  FMFs; (g), (h)  $[^{18}\text{F}]\text{FBB}$  FMFs. Brain regions are sorted as specified in Table S1 (left hemisphere followed by right hemisphere).

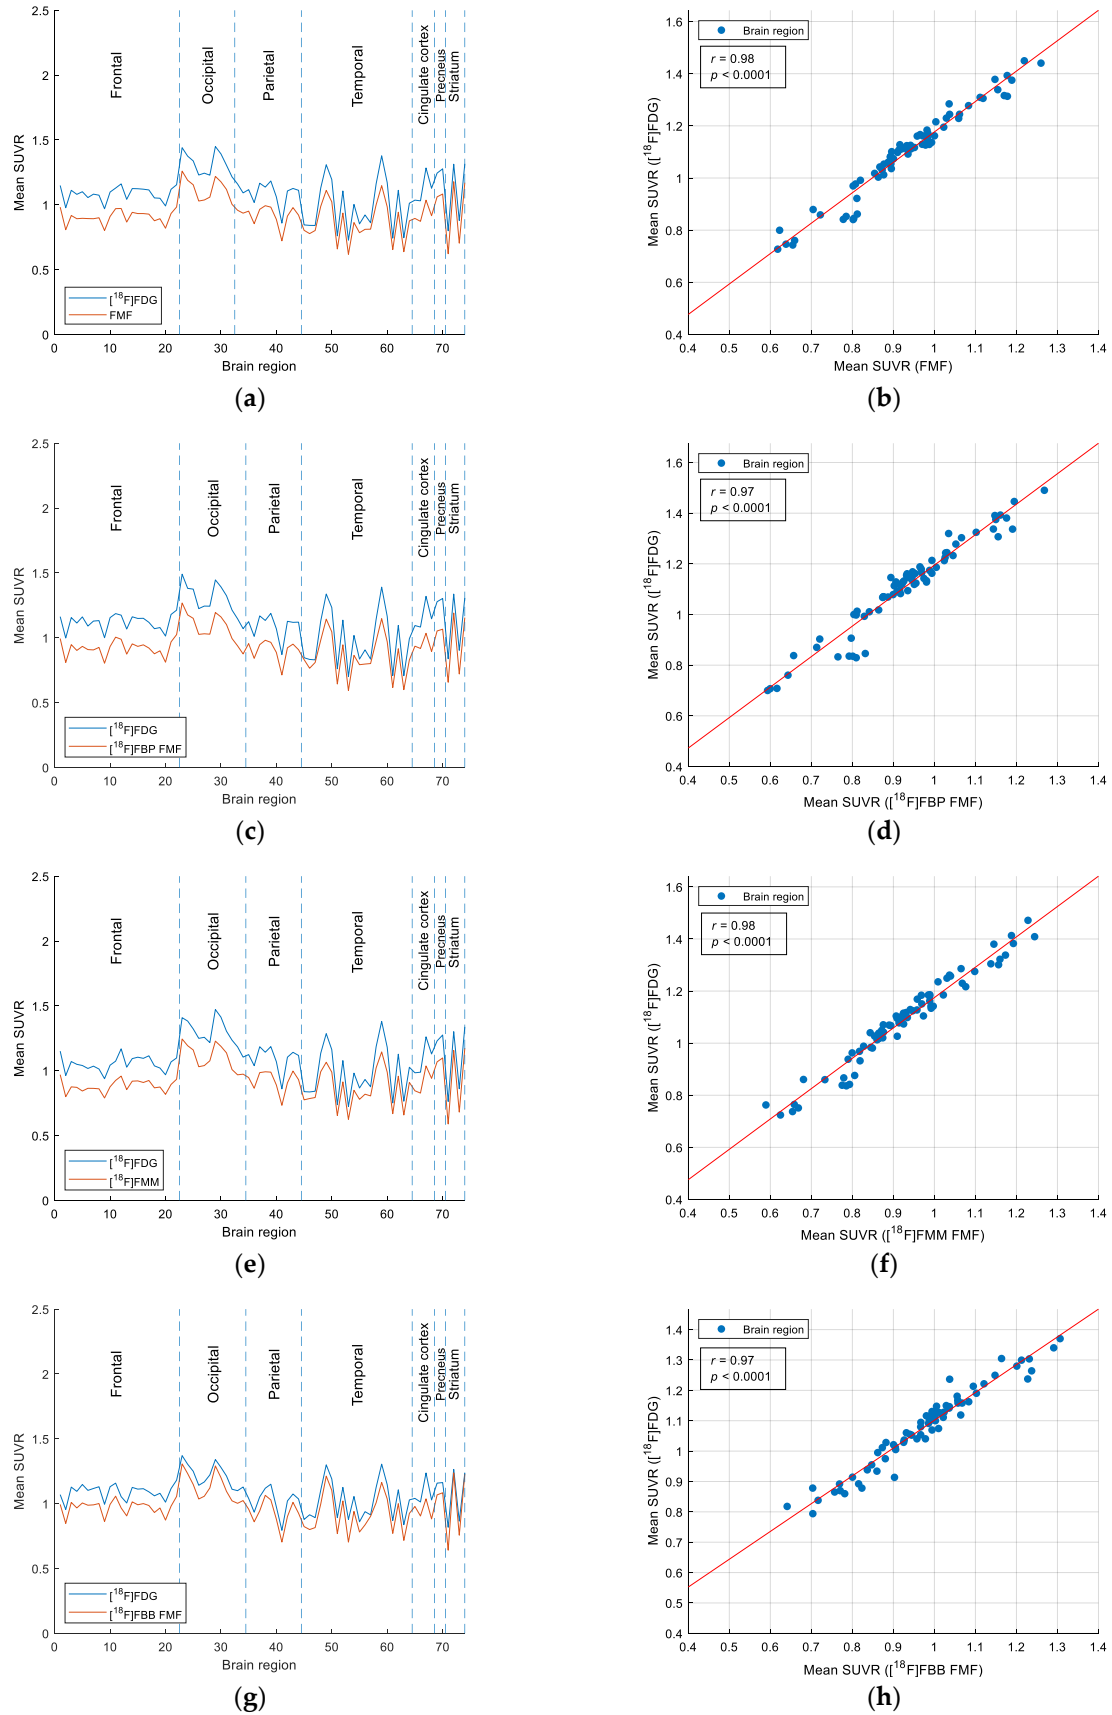

**Figure S2.** Intensity profiles and correlation charts with least squares line of the mean SUVRs of FMFs and  $[^{18}\text{F}]\text{FDG}$  PET of  $\text{A}\beta^+$  patients. (a), (b) Study cohort; (c), (d)  $[^{18}\text{F}]\text{FBP}$  FMFs; (e), (f)  $[^{18}\text{F}]\text{FMM}$  FMFs; (g), (h)  $[^{18}\text{F}]\text{FBB}$  FMFs. Brain regions are sorted as specified in Table S1 (left hemisphere followed by right hemisphere).
